# Supplementary material for: Innate Immune Evasion of Lyme Disease Pathogen Drives Alzheimer-Like Pathology
Source: Research Square preprint supplement (doi:10.21203/rs.3.rs-8804079/v1), 2026-03-18
Supplement: Supplementary file 1 [file 430dd1e81d692b07bf927952.xlsx]

## Sheet: Sheet1
Extended data excel file S1
Pathway	P-value	Activation z-score	Percentage overlap
Complement cascade	1e-17	4.49	21.24%
Neutrophil degranulation	2.04e-17	1.94	9.47%
Binding and Uptake of Ligands by Scavenger Receptors	3.03e-16	2.84	22.58%
LXR/RXR Activation	7.5e-15	2.4	18.18%
Regulation of Insulin-like Growth Factor (IGF) transport and uptake by IGFBPs	1.07e-14	0.43	17.89%
B Cell Development	3.66e-13	- -	17.24%
Post-translational protein phosphorylation	6.93e-13	-0.23	17.92%
Acute Phase Response Signaling	8e-13	2.12	13.11%
Coagulation System	3.27e-12	1.16	34.29%
Complement System	6.99e-12	0	32.43%
Formation of Fibrin Clot (Clotting Cascade)	1e-11	2.89	31.58%
DHCR24 Signaling Pathway	1.04e-11	3.44	14.49%
Cell surface interactions at the vascular wall	1.62e-11	2.29	11.98%
GAIT Translation Signaling Pathway	3.92e-11	-4.12	10.96%
Clathrin-mediated Endocytosis Signaling	5.66e-11	- -	11.27%
Communication between Innate and Adaptive Immune Cells	1.09e-10	4.58	11.46%
ID3 Signaling Pathway	1.1e-10	-4.49	10.43%
Fcgamma receptor (FCGR) dependent phagocytosis	1.61e-10	4.36	13.29%
p70S6K Signaling	1.98e-10	- -	10.60%
Response to elevated platelet cytosolic Ca2	3.18e-10	0.94	13.64%
Intrinsic Prothrombin Activation Pathway	3.98e-10	1.26	27.50%
Systemic Lupus Erythematosus Signaling	4.81e-10	- -	9.00%
TRIM21 Intracellular Antibody Signaling Pathway	1.6e-09	4.15	10.45%
FcγRIIB Signaling in B Lymphocytes	3.15e-09	- -	11.18%
Altered T Cell and B Cell Signaling in Rheumatoid Arthritis	8.42e-09	- -	10%
IL-15 Signaling	1.21e-08	- -	10.91%
Extrinsic Prothrombin Activation Pathway	1.63e-08	- -	43.75%
IL-12 Signaling and Production in Macrophages	2.27e-08	-2.98	9.43%
MSP-RON Signaling Pathway	2.31e-08	- -	19.30%
Signaling by ROBO receptors	4.68e-08	1.41	8.64%
B Cell Receptor Signaling	5.25e-08	- -	8.24%
Maturity Onset Diabetes of Young (MODY) Signaling	6.52e-08	- -	15.58%
Immunoregulatory interactions between a Lymphoid and a non-Lymphoid cell	7.21e-08	2.83	9.73%
Phospholipase C Signaling	1.38e-07	- -	6.84%
Eukaryotic Translation Elongation	2.23e-07	3.74	11.67%
PI3K Signaling in B Lymphocytes	2.95e-07	- -	8.44%
L1CAM interactions	3.03e-07	-1.6	11.38%
Atherosclerosis Signaling	3.35e-07	3.61	11.29%
Interleukin-4 and Interleukin-13 signaling	5.77e-07	3.61	11.71%
Actin Cytoskeleton Signaling	6.55e-07	3.05	8.02%
Nonsense-Mediated Decay (NMD)	8.71e-07	3.61	11.30%
Response of EIF2AK4 (GCN2) to amino acid deficiency	1.35e-06	3.46	11.88%
Integrin cell surface interactions	1.58e-06	-0.3	12.94%
Role of NFAT in Regulation of the Immune Response	1.83e-06	- -	6.93%
Retinoid metabolism and transport	3.17e-06	1.41	18.18%
Clathrin-mediated endocytosis	3.22e-06	0.28	10.08%
EPH-Ephrin signaling	3.49e-06	1.51	11.96%
Caveolar-mediated Endocytosis Signaling	3.58e-06	0.82	13.33%
RHOGDI Signaling	3.7e-06	0	7.80%
Eukaryotic Translation Termination	8.33e-06	3.46	10%
Gene and protein expression by JAK-STAT signaling after IL-12 stimulation	1.01e-05	-1.13	18.92%
Production of Nitric Oxide and Reactive Oxygen Species in Macrophages	1.05e-05	3.32	7.98%
Regulation of Actin-based Motility by Rho	1.81e-05	2.83	10.09%
Plasma lipoprotein assembly, remodeling, and clearance	2.36e-05	2.33	12.16%
Coronavirus Replication Pathway	2.39e-05	- -	8.39%
Systemic Lupus Erythematosus in B Cell Signaling Pathway	3.56e-05	1	5.88%
SRP-dependent cotranslational protein targeting to membrane	3.69e-05	3.46	8.63%
Immunogenic Cell Death Signaling Pathway	4.43e-05	1.41	11.25%
Selenoamino acid metabolism	5.22e-05	3.46	8.33%
Eukaryotic Translation Initiation	6.38e-05	3.46	8.16%
Ribosomal Quality Control Signaling Pathway	6.96e-05	3.74	7.14%
Remodeling of Epithelial Adherens Junctions	7.66e-05	2	11.94%
Regulation of TLR by endogenous ligand	7.73e-05	2.24	22.73%
Post-translational modification: synthesis of GPI-anchored proteins	0.000103	-2.33	10.11%
Synaptogenesis Signaling Pathway	0.000111	-1.21	5.77%
Neuroprotective Role of THOP1 in Alzheimer's Disease	0.000114	1.13	9.01%
Fcγ Receptor-mediated Phagocytosis in Macrophages and Monocytes	0.000145	3	9.68%
MSP-RON Signaling in Cancer Cells Pathway	0.000158	1.26	7.97%
HSP90 chaperone cycle for steroid hormone receptors in the presence of ligand	0.000161	2.65	12.50%
Hepatic Fibrosis / Hepatic Stellate Cell Activation	0.000174	- -	6.91%
Virus Entry via Endocytic Pathways	0.000177	1.89	8.55%
Nuclear Cytoskeleton Signaling Pathway	0.000235	1.6	6.36%
RHO GTPases Activate WASPs and WAVEs	0.000258	2.45	13.95%
Glycosaminoglycan metabolism	0.000345	-2.53	7.87%
Crosstalk between Dendritic Cells and Natural Killer Cells	0.000408	- -	9.41%
Integrin Signaling	0.000423	3.05	6.31%
EIF2 Signaling	0.00046	1.89	5.96%
Major pathway of rRNA processing in the nucleolus and cytosol	0.000485	3.61	6.22%
Toll-like Receptor Cascades	0.000497	2.24	15.63%
Signaling by Rho Family GTPases	0.000499	1.51	5.66%
Primary Immunodeficiency Signaling	0.000532	- -	12.24%
Leukocyte Extravasation Signaling	0.000573	2.11	6.45%
MSP-RON Signaling in Macrophages Pathway	0.000584	1.41	8.04%
RAC Signaling	0.00063	1.63	7.30%
Actin Nucleation by ARP-WASP Complex	0.000646	2	8.79%
Apoptotic execution phase	0.000735	2.45	11.54%
SPINK1 Pancreatic Cancer Pathway	0.000814	0.45	11.32%
Amyloid fiber formation	0.000834	0.38	9.59%
Chaperone Mediated Autophagy	0.00103	2	18.18%
Allograft Rejection Signaling	0.00124	- -	8.97%
RAF/MAP kinase cascade	0.00128	-0.58	5.36%
Autoimmune Thyroid Disease Signaling	0.00133	- -	8.86%
Cargo recognition for clathrin-mediated endocytosis	0.00165	-0.71	7.62%
Paxillin Signaling	0.00175	2.24	7.55%
Semaphorin interactions	0.00219	1.63	9.38%
Advanced glycosylation endproduct receptor signaling	0.00223	- -	23.08%
Hematoma Resolution Signaling Pathway	0.00247	-1.51	5.20%
DNA Double-Strand Break Repair by Non-Homologous End Joining	0.0028	- -	21.43%
Neuregulin Signaling	0.00292	- -	6.96%
CDC42 Signaling	0.00318	2.24	5.88%
Sensory processing of sound by inner hair cells of the cochlea	0.00321	2.45	8.70%
Hematopoiesis from Pluripotent Stem Cells	0.00321	- -	8.70%
Telomere Extension by Telomerase	0.00344	- -	20%
Interferon gamma signaling	0.00361	0.38	7.45%
RHO GTPases activate IQGAPs	0.00382	2	12.90%
Granzyme A Signaling	0.00426	-1.63	8.22%
Sertoli Cell-Sertoli Cell Junction Signaling	0.00471	0.58	5.02%
Neutrophil Extracellular Trap Signaling Pathway	0.00495	2.5	4.35%
Dendritic Cell Maturation	0.00525	2.33	5.19%
Fc epsilon receptor (FCERI) signaling	0.00576	2.83	5.41%
Epithelial Adherens Junction Signaling	0.00593	2.33	5.73%
Aspartate Degradation II	0.00621	- -	33.33%
S100 Family Signaling Pathway	0.00626	-0.2	3.56%
RHO GTPase cycle	0.00696	3.3	4%
Notch Signaling	0.00726	- -	10.81%
Neuroinflammation Signaling Pathway	0.00869	0	4.47%
Sertoli Cell-Germ Cell Junction Signaling Pathway (Enhanced)	0.00916	1.51	4.80%
Netrin Signaling	0.00943	1	5.33%
Granulocyte Adhesion and Diapedesis	0.01	- -	5.26%
Regulation of Cellular Mechanics by Calpain Protease	0.01	- -	6.82%
Ephrin Receptor Signaling	0.01	1.63	4.95%
Regulation of mRNA stability by proteins that bind AU-rich elements	0.01	1.63	6.74%
Superoxide Radicals Degradation	0.01	- -	25%
Sucrose Degradation V (Mammalian)	0.01	- -	25%
NFE2L2 regulates pentose phosphate pathway genes	0.01	- -	25%
Atorvastatin ADME	0.01	- -	25%
Stress Granule Signaling Pathway	0.01	0.3	4.64%
Cell junction organization	0.01	-0.82	6.59%
IL-8 Signaling	0.01	2.33	4.83%
Coronavirus Pathogenesis Pathway	0.01	-1.67	4.83%
Interferon alpha/beta signaling	0.01	1.34	7.58%
PTEN Signaling	0.01	0.45	5.33%
Agrin Interactions at Neuromuscular Junction	0.01	1.34	7.35%
Malate-aspartate shuttle	0.01	- -	22.22%
Glycolysis I	0.01	- -	12%
Gluconeogenesis I	0.01	- -	12%
ROBO SLIT Signaling Pathway	0.01	-1.89	5.69%
Axonal Guidance Signaling	0.02	- -	3.66%
Pentose Phosphate Pathway	0.02	- -	20%
NAD Phosphorylation and Dephosphorylation	0.02	- -	20%
Signaling by the B Cell Receptor (BCR)	0.02	2.83	5.10%
Ephrin B Signaling	0.02	0.45	6.85%
Glycation Signaling Pathway	0.02	1.26	4.52%
Agranulocyte Adhesion and Diapedesis	0.02	- -	4.74%
trans-Golgi Network Vesicle Budding	0.02	-0.45	6.76%
GP1b-IX-V activation signalling	0.02	- -	18.18%
ILK Signaling	0.02	2.45	4.62%
VDR/RXR Activation	0.02	- -	6.49%
Role of JAK family kinases in IL-6-type Cytokine Signaling	0.02	2.24	6.49%
Phagosome Formation	0.02	3.13	3.32%
Extracellular matrix organization	0.02	-2.45	5.66%
Signaling by EGFR	0.02	0	7.55%
γ-glutamyl Cycle	0.03	- -	16.67%
UDP-N-acetyl-D-galactosamine Biosynthesis II	0.03	- -	16.67%
Platelet Aggregation (Plug Formation)	0.03	- -	16.67%
Reelin Signaling in Neurons	0.03	0.38	5.07%
Glutamate binding, activation of AMPA receptors and synaptic plasticity	0.03	- -	9.68%
Multiple Sclerosis Signaling Pathway	0.03	3	4.39%
Dissolution of Fibrin Clot	0.03	- -	15.38%
Factors involved in megakaryocyte development and platelet production	0.03	2.24	6.02%
Th1 Pathway	0.03	0.82	5.26%
Pentose phosphate pathway	0.03	- -	14.29%
LGI-ADAM interactions	0.03	- -	14.29%
Chondroitin Sulfate Degradation (Metazoa)	0.03	- -	14.29%
Antigen Presentation Pathway	0.04	- -	8.57%
Platelet Adhesion to exposed collagen	0.04	- -	13.33%
Phagosome Maturation	0.04	- -	4.61%
RHOA Signaling	0.04	2.45	4.96%
NCAM signaling for neurite out-growth	0.04	-2	6.35%
Granzyme B Signaling	0.04	- -	12.50%
Caspase activation via Death Receptors in the presence of ligand	0.04	- -	12.50%
Adenosine Nucleotides Degradation II	0.04	- -	12.50%
Chaperone Mediated Autophagy Signaling Pathway	0.04	0.71	3.91%
Sheddase Signaling Pathway	0.04	1.41	4.26%
Hedgehog ligand biogenesis	0.05	1	6.15%
Death Receptor Signaling	0.05	2.24	5.32%
MHC class II antigen presentation	0.05	0.82	4.80%
Protein methylation	0.05	- -	11.76%
Role of PKR in Interferon Induction and Antiviral Response	0.05	-2.24	4.69%
Mechanisms of Viral Exit from Host Cells	0.05	- -	7.32%
Centrosomal KIAA0586 Signaling Pathway	0.05	2.45	4.65%
Smooth Muscle Contraction	0.06	- -	7.14%
MyD88:MAL(TIRAP) cascade initiated on plasma membrane	0.06	- -	7.14%
Purine Nucleotides Degradation II (Aerobic)	0.06	- -	10.53%
GABA synthesis, release, reuptake and degradation	0.06	- -	10.53%
Regulation of eIF4 and p70S6K Signaling	0.06	- -	4%
SNARE Signaling Pathway	0.06	-0.82	4.51%
MTF1 activates gene expression	0.06	- -	33.33%
Lactose synthesis	0.06	- -	33.33%
Glutathione Biosynthesis	0.06	- -	33.33%
Glutamate Degradation II	0.06	- -	33.33%
Diphthamide Biosynthesis	0.06	- -	33.33%
Aspartate Biosynthesis	0.06	- -	33.33%
Translocation of SLC2A4 (GLUT4) to the plasma membrane	0.06	2	5.63%
Glioma Invasiveness Signaling	0.06	- -	5.63%
Germ Cell-Sertoli Cell Junction Signaling	0.06	- -	4.19%
Epithelial Membrane Protein Signaling Pathway	0.06	-1.13	4.19%
DDX58/IFIH1-mediated induction of interferon-alpha/beta	0.06	1	5.56%
HIF1α Signaling	0.06	-0.38	3.94%
Cyclophilin Signaling Pathway	0.07	1	3.77%
Interleukin-10 signaling	0.07	- -	6.67%
CLEAR Signaling Pathway	0.07	-1.9	3.60%
TCA Cycle II (Eukaryotic)	0.07	- -	9.52%
RHO GTPases activate PAKs	0.07	- -	9.52%
Citric acid cycle (TCA cycle)	0.07	- -	9.52%
Antimicrobial peptides	0.07	- -	6.52%
Pulmonary Fibrosis Idiopathic Signaling Pathway	0.07	-1	3.44%
Macropinocytosis Signaling	0.08	- -	5.26%
iNOS Signaling	0.08	- -	6.38%
NAD Salvage Pathway II	0.08	- -	9.09%
Tight Junction Signaling	0.08	- -	3.98%
PFKFB4 Signaling Pathway	0.08	- -	6.25%
Gap junction trafficking and regulation	0.08	- -	6.25%
Pentose Phosphate Pathway (Oxidative Branch)	0.08	- -	25%
L-cysteine Degradation I	0.08	- -	25%
Sirtuin Signaling Pathway	0.08	1.67	3.47%
Nephrin family interactions	0.08	- -	8.70%
CD28 Signaling in T Helper Cells	0.08	2	4.14%
Degradation of the extracellular matrix	0.09	-1	5%
Sleep NREM Signaling Pathway	0.09	0.45	4.42%
Fertilization	0.09	- -	8.33%
Signaling by FGFR1	0.09	- -	5.88%
LPS/IL-1 Mediated Inhibition of RXR Function	0.09	1.34	3.62%
BAG2 Signaling Pathway	0.1	- -	4.82%
Signaling by MST1	0.1	- -	20%
Pyruvate Fermentation to Lactate	0.1	- -	20%
IL-17A Signaling in Gastric Cells	0.1	- -	7.69%
Somitogenesis	0.1	- -	5.56%
CSDE1 Signaling Pathway	0.1	- -	5.56%
mTOR Signaling	0.1	- -	3.54%
Osteoarthritis Pathway	0.11	0	3.52%
Glucose metabolism	0.11	-1	4.65%
Sensory processing of sound by outer hair cells of the cochlea	0.11	- -	5.45%
FAT10 Signaling Pathway	0.11	- -	5.45%
Integrin signaling	0.11	- -	7.41%
ABRA Signaling Pathway	0.11	2	4.60%
Protein Ubiquitination Pathway	0.11	2.83	3.35%
RHO GTPases activate PKNs	0.12	- -	7.14%
IL-27 Signaling Pathway	0.12	0.45	4.07%
Trehalose Degradation II (Trehalase)	0.12	- -	16.67%
Salvage Pathways of Pyrimidine Deoxyribonucleotides	0.12	- -	16.67%
Pentose Phosphate Pathway (Non-oxidative Branch)	0.12	- -	16.67%
GDP-mannose Biosynthesis	0.12	- -	16.67%
Epithelial-Mesenchymal Transition (EMT) during gastrulation	0.12	- -	16.67%
ISGylation Signaling Pathway	0.12	1	4.44%
Glucocorticoid Receptor Signaling	0.12	- -	2.93%
PI3K/AKT Signaling	0.12	- -	3.55%
Signaling by ERBB4	0.12	- -	5.17%
Activin Inhibin Signaling Pathway	0.12	1.89	3.54%
TNFs bind their physiological receptors	0.12	- -	6.90%
Myogenesis	0.12	- -	6.90%
Semaphorin Signaling in Neurons	0.13	- -	5.08%
Role of Macrophages, Fibroblasts and Endothelial Cells in Rheumatoid Arthritis	0.13	2.53	3.17%
ID1 Signaling Pathway	0.13	-1.89	3.50%
Warburg Effect Signaling Pathway	0.13	0.45	3.94%
FOXO-mediated transcription of oxidative stress, metabolic and neuronal genes	0.13	- -	6.67%
SPINK1 General Cancer Pathway	0.13	- -	5%
Th1 and Th2 Activation Pathway	0.13	- -	3.66%
CTLA4 Signaling in Cytotoxic T Lymphocytes	0.14	-0.38	3.45%
Gamma carboxylation, hypusinylation, hydroxylation, and arylsulfatase activation	0.14	- -	4.92%
MyD88 dependent cascade initiated on endosome	0.14	- -	6.45%
Purine Ribonucleosides Degradation to Ribose-1-phosphate	0.14	- -	14.29%
Ceramide Degradation	0.14	- -	14.29%
Aryl hydrocarbon receptor signalling	0.14	- -	14.29%
Adenine and Adenosine Salvage III	0.14	- -	14.29%
DYRK1A Signaling Pathway	0.14	-1.63	3.59%
fMLP Signaling in Neutrophils	0.14	2	3.82%
Gα12/13 Signaling	0.14	2.24	3.79%
RIPK1-mediated regulated necrosis	0.14	- -	6.25%
Activation of Matrix Metalloproteinases	0.14	- -	6.25%
Collagen degradation	0.15	- -	4.76%
Hepatic Fibrosis Signaling Pathway	0.15	1.89	2.96%
mRNA 3 Prime End Processing Signaling Pathway	0.15	0	4.08%
Mitochondrial protein degradation	0.15	1	4.08%
Signaling by NOTCH2	0.15	- -	6.06%
TEC Kinase Signaling	0.15	- -	3.33%
MIF-mediated Glucocorticoid Regulation	0.16	- -	5.88%
Late endosomal microautophagy	0.16	- -	5.88%
Sumoylation Pathway	0.16	- -	3.96%
Cellular response to heat stress	0.16	1	3.96%
COPI-mediated anterograde transport	0.16	1	3.96%
NRF2-mediated Oxidative Stress Response	0.16	- -	3.27%
Nucleotide catabolism	0.17	- -	5.71%
GPVI-mediated activation cascade	0.17	- -	5.71%
RHO GTPases Activate Formins	0.17	2.24	3.60%
TNFR2 non-canonical NF-kB pathway	0.17	- -	4.41%
MicroRNA Biogenesis Signaling Pathway	0.17	1.63	3.35%
Transcriptional regulation by the AP-2 (TFAP2) family of transcription factors	0.17	- -	5.56%
Sphingosine and Sphingosine-1-phosphate Metabolism	0.17	- -	11.11%
Role of Lipids/Lipid Rafts in the Pathogenesis of Influenza	0.17	- -	11.11%
Pathogenesis of Multiple Sclerosis	0.17	- -	11.11%
Lipophagy	0.17	- -	11.11%
GDP-glucose Biosynthesis	0.17	- -	11.11%
NAD Signaling Pathway	0.18	-0.45	3.52%
Detoxification of Reactive Oxygen Species	0.18	- -	5.41%
Semaphorin Neuronal Repulsive Signaling Pathway	0.18	- -	3.50%
Signaling by VEGF	0.18	2	3.77%
PPARα/RXRα Activation	0.18	-0.45	3.30%
MyD88-independent TLR4 cascade	0.19	- -	5.26%
Membrane Repair Signaling Pathway	0.19	0	3.70%
Metallothioneins bind metals	0.19	- -	10%
Glycogen Degradation II	0.19	- -	10%
Glucose and Glucose-1-phosphate Degradation	0.19	- -	10%
ATF6 (ATF6-alpha) activates chaperone genes	0.19	- -	10%
Hypoxia Signaling in the Cardiovascular System	0.2	- -	4.05%
Dilated Cardiomyopathy Signaling Pathway	0.2	- -	3.36%
O-linked glycosylation	0.21	-1	3.57%
Pre-NOTCH Expression and Processing	0.21	- -	4%
RHO GTPases activate KTN1	0.21	- -	9.09%
Aspartate and asparagine metabolism	0.21	- -	9.09%
Natural Killer Cell Signaling	0.21	0.82	3.16%
DAP12 interactions	0.21	- -	4.88%
Xenobiotic Metabolism AHR Signaling Pathway	0.21	- -	3.95%
Toll-like Receptor Signaling	0.21	- -	3.95%
Signaling by NOTCH1	0.21	- -	3.95%
PKR-mediated signaling	0.21	- -	3.95%
HIPPO signaling	0.21	- -	3.95%
Regulation of the Epithelial Mesenchymal Transition by Growth Factors Pathway	0.21	0	3.14%
Gap Junction Signaling	0.22	1	2.86%
Regulation of beta-cell development	0.22	- -	4.76%
MIF Regulation of Innate Immunity	0.22	- -	4.76%
Vitamin D (calciferol) metabolism	0.22	- -	8.33%
Presynaptic depolarization and calcium channel opening	0.22	- -	8.33%
HDR through MMEJ (alt-NHEJ)	0.22	- -	8.33%
Glycogen Degradation III	0.22	- -	8.33%
PAK Signaling	0.23	- -	3.45%
PI3K Cascade	0.23	- -	4.65%
Aggrephagy	0.23	- -	4.65%
Wound Healing Signaling Pathway	0.23	0.38	2.97%
IL-17A Signaling in Fibroblasts	0.23	- -	3.80%
HMGB1 Signaling	0.23	2	3.18%
Netrin-1 signaling	0.23	- -	4.55%
Elastic fibre formation	0.23	- -	4.55%
Collagen chain trimerization	0.23	- -	4.55%
IL-15 Production	0.23	-2	3.39%
Processing of Capped Intron-Containing Pre-mRNA	0.24	2.83	2.85%
Huntington's Disease Signaling	0.24	- -	2.84%
Trafficking and processing of endosomal TLR	0.24	- -	7.69%
Nephron development	0.24	- -	7.69%
Guanosine Nucleotides Degradation III	0.24	- -	7.69%
Role of Tissue Factor in Cancer	0.24	0	3%
Arachidonic acid metabolism	0.24	- -	4.44%
Metabolism of water-soluble vitamins and cofactors	0.25	- -	3.66%
Retinoic acid Mediated Apoptosis Signaling	0.25	- -	4.35%
Urate Biosynthesis/Inosine 5'-phosphate Degradation	0.26	- -	7.14%
Tryptophan catabolism	0.26	- -	7.14%
Phenylalanine Degradation IV (Mammalian, via Side Chain)	0.26	- -	7.14%
Metabolism of nitric oxide: NOS3 activation and regulation	0.26	- -	7.14%
Leukotriene Biosynthesis	0.26	- -	7.14%
Glutamate and glutamine metabolism	0.26	- -	7.14%
Colanic Acid Building Blocks Biosynthesis	0.26	- -	7.14%
Choline Biosynthesis III	0.26	- -	7.14%
SUMOylation of RNA binding proteins	0.26	- -	4.26%
Nonhomologous End-Joining (NHEJ)	0.26	- -	4.26%
NR1H2 and NR1H3-mediated signaling	0.26	- -	4.26%
Lipid Antigen Presentation by CD1	0.26	- -	4.26%
Heme signaling	0.26	- -	4.26%
Beta-catenin independent WNT signaling	0.26	1	2.93%
LPS-stimulated MAPK Signaling	0.26	- -	3.53%
Macrophage Classical Activation Signaling Pathway	0.27	- -	3.01%
Regulation of cholesterol biosynthesis by SREBP (SREBF)	0.27	- -	6.67%
Rap1 signalling	0.27	- -	6.67%
Dermatan Sulfate Degradation (Metazoa)	0.27	- -	6.67%
Class I MHC mediated antigen processing and presentation	0.27	2.53	2.64%
Signaling by NOTCH3	0.27	- -	4.08%
ERK/MAPK Signaling	0.28	- -	2.86%
Transcriptional regulation by RUNX2	0.28	- -	4%
Signaling by ERBB2	0.28	- -	4%
Xenobiotic Metabolism CAR Signaling Pathway	0.28	1	2.94%
Signal regulatory protein family interactions	0.29	- -	6.25%
Macrophage Alternative Activation Signaling Pathway	0.29	2.24	2.92%
Th2 Pathway	0.29	- -	3.08%
HGF Signaling	0.29	- -	3.05%
G alpha (q) signalling events	0.3	-0.45	2.89%
MAPK6/MAPK4 signaling	0.3	- -	3.30%
FXR/RXR Activation	0.3	-1.34	2.87%
RAN Signaling	0.3	- -	5.88%
FOXO-mediated transcription of cell cycle genes	0.3	- -	5.88%
Spliceosomal Cycle	0.3	- -	3.77%
Regulation of Apoptosis	0.3	- -	3.77%
DNA Damage/Telomere Stress Induced Senescence	0.3	- -	3.77%
Cerebral Malformation Signaling Pathway	0.31	1	2.99%
Cachexia Signaling Pathway	0.31	2.12	2.57%
White Adipose Tissue Browning Pathway	0.31	-2	2.96%
Metabolism of amine-derived hormones	0.32	- -	5.56%
Gastrin-CREB signalling pathway via PKC and MAPK	0.32	- -	5.56%
Formation of the nephric duct	0.32	- -	5.56%
Digestion	0.32	- -	5.56%
Intrinsic Pathway for Apoptosis	0.32	- -	3.64%
E3 ubiquitin ligases ubiquitinate target proteins	0.32	- -	3.64%
Transcriptional regulation by RUNX3	0.33	- -	3.13%
NLR signaling pathways	0.33	- -	3.57%
Signaling by Activin	0.33	- -	5.26%
RHO GTPases activate CIT	0.33	- -	5.26%
RHO GTPases Activate ROCKs	0.33	- -	5.26%
Glyoxylate metabolism and glycine degradation	0.33	- -	5.26%
FOXO-mediated transcription	0.33	- -	5.26%
VEGF Signaling	0.33	- -	3.09%
STAT3 Pathway	0.33	-2	2.88%
Neurexins and neuroligins	0.34	- -	3.51%
T Helper Cell Differentiation	0.34	- -	3.06%
Signaling by NOTCH4	0.34	1	2.84%
Pancreatic Secretion Signaling Pathway	0.34	-2	2.63%
Signaling by PDGF	0.34	- -	3.45%
Iron uptake and transport	0.34	- -	3.45%
Cytotoxic T Lymphocyte-mediated Apoptosis of Target Cells	0.34	- -	3.45%
Receptor-type tyrosine-protein phosphatases	0.34	- -	5%
NFE2L2 regulating anti-oxidant/detoxification enzymes	0.34	- -	5%
Maturation of TCA enzymes and regulation of TCA cycle	0.34	- -	5%
Interleukin-12 family signaling	0.34	- -	5%
Formation of paraxial mesoderm	0.34	- -	5%
Formation of ATP by chemiosmotic coupling	0.34	- -	5%
PKCθ Signaling in T Lymphocytes	0.35	1	2.70%
Serotonin Receptor Signaling	0.35	0.3	2.43%
Metabolism of polyamines	0.35	- -	3.39%
PIP3 activates AKT signaling	0.35	-1	2.80%
PD-1, PD-L1 cancer immunotherapy pathway	0.35	- -	2.97%
Synaptic adhesion-like molecules	0.36	- -	4.76%
Endoplasmic Reticulum Stress Pathway	0.36	- -	4.76%
NIK-->noncanonical NF-kB signaling	0.36	- -	3.33%
Assembly of collagen fibrils and other multimeric structures	0.36	- -	3.33%
DNA Replication Pre-Initiation	0.36	- -	2.94%
Opioid Signaling Pathway	0.36	-1.13	2.53%
PPAR Signaling	0.37	- -	2.91%
Insertion of tail-anchored proteins into the endoplasmic reticulum membrane	0.37	- -	4.55%
Phospholipases	0.37	- -	3.23%
Telomerase Signaling	0.38	- -	2.86%
Type II Diabetes Mellitus Signaling	0.38	- -	2.68%
Transcriptional Regulation by MECP2	0.38	- -	3.17%
RAF-independent MAPK1/3 activation	0.39	- -	4.35%
Nucleotide salvage	0.39	- -	4.35%
Differential Regulation of Cytokine Production in Intestinal Epithelial Cells by IL-17A and IL-17F	0.39	- -	4.35%
Apelin Cardiac Fibroblast Signaling Pathway	0.39	- -	4.35%
Pulmonary Healing Signaling Pathway	0.39	-0.45	2.56%
Integration of energy metabolism	0.39	- -	2.80%
Mitotic Roles of Polo-Like Kinase	0.39	- -	3.13%
Mitochondrial biogenesis	0.39	- -	3.13%
Cytosolic sensors of pathogen-associated DNA	0.39	- -	3.13%
Mitochondrial protein import	0.4	- -	3.08%
Tumoricidal Function of Hepatic Natural Killer Cells	0.4	- -	4.17%
RHO GTPases Activate NADPH Oxidases	0.4	- -	4.17%
Growth hormone receptor signaling	0.4	- -	4.17%
Role of Hypercytokinemia/hyperchemokinemia in the Pathogenesis of Influenza	0.4	- -	3.03%
Mitotic G2-G2/M phases	0.41	2.24	2.51%
Role of JAK1, JAK2 and TYK2 in Interferon Signaling	0.41	- -	4%
Metabolism of cofactors	0.41	- -	4%
Insulin processing	0.41	- -	4%
Collagen biosynthesis and modifying enzymes	0.41	- -	2.99%
Role of Osteoclasts in Rheumatoid Arthritis Signaling Pathway	0.41	1	2.40%
Microautophagy Signaling Pathway	0.42	- -	2.55%
Inhibition of ARE-Mediated mRNA Degradation Pathway	0.42	- -	2.53%
Nitric Oxide Signaling in the Cardiovascular System	0.43	- -	2.63%
Paracetamol ADME	0.44	- -	3.70%
Regulation of RUNX2 expression and activity	0.44	- -	2.82%
Cholecystokinin/Gastrin-mediated Signaling	0.44	- -	2.59%
Sphingosine-1-phosphate Signaling	0.45	- -	2.56%
Xenobiotic Metabolism PXR Signaling Pathway	0.45	- -	2.45%
Sulfur amino acid metabolism	0.45	- -	3.57%
Graft-versus-Host Disease Signaling	0.45	- -	2.74%
COPII-mediated vesicle transport	0.45	- -	2.74%
TCR signaling	0.46	- -	2.52%
Mitochondrial Division Signaling Pathway	0.46	-1	2.42%
Calcium Signaling	0.46	- -	2.36%
Surfactant metabolism	0.46	- -	3.45%
Role of p14/p19ARF in Tumor Suppression	0.46	- -	3.45%
NOD1/2 Signaling Pathway	0.46	1	2.41%
IL-33 Signaling Pathway	0.46	- -	2.41%
ISG15 antiviral mechanism	0.46	- -	2.70%
ERK5 Signaling	0.46	- -	2.70%
Gαq Signaling	0.47	- -	2.40%
Ferroptosis Signaling Pathway	0.47	- -	2.48%
Extra-nuclear estrogen signaling	0.47	- -	2.67%
Cellular response to hypoxia	0.47	- -	2.67%
Thyroid Hormone Metabolism II (via Conjugation and/or Degradation)	0.47	- -	3.33%
Regulation of CDH11 Expression and Function	0.47	- -	3.33%
Protein ubiquitination	0.47	- -	3.33%
OX40 Signaling Pathway	0.47	- -	2.63%
Transcriptional regulation of brown and beige adipocyte differentiation	0.48	- -	3.23%
TNFR2 Signaling	0.48	- -	3.23%
Pancreatic Adenocarcinoma Signaling	0.48	- -	2.42%
GP6 Signaling Pathway	0.48	- -	2.42%
Thrombin Signaling	0.49	- -	2.28%
Asparagine N-linked glycosylation	0.49	- -	2.40%
Thrombin signalling through proteinase activated receptors (PARs)	0.49	- -	3.13%
Oxytocin in Spinal Neurons Signaling Pathway	0.49	- -	3.13%
G-protein beta:gamma signalling	0.49	- -	3.13%
FAK Signaling	0.49	-0.28	2.16%
14-3-3-mediated Signaling	0.49	- -	2.38%
Signaling by MET	0.49	- -	2.53%
Tumor Microenvironment Pathway	0.5	-1	2.30%
Myelination Signaling Pathway	0.5	-1.13	2.20%
Tuberculosis Active Signaling Pathway	0.5	1.34	2.24%
Sialic acid metabolism	0.5	- -	3.03%
Cristae formation	0.5	- -	3.03%
IL-6 Signaling	0.5	- -	2.34%
Signaling by NTRK1 (TRKA)	0.51	- -	2.47%
G Beta Gamma Signaling	0.51	- -	2.33%
Superpathway of Methionine Degradation	0.51	- -	2.94%
Cargo concentration in the ER	0.51	- -	2.94%
Histone Modification Signaling Pathway	0.52	2.45	2.18%
GABA Receptor Signaling	0.52	- -	2.29%
Class A/1 (Rhodopsin-like receptors)	0.52	-0.38	2.16%
Transport of bile salts and organic acids, metal ions and amine compounds	0.52	- -	2.41%
NAP1L1 Transcription Regulation Signaling Pathway	0.52	- -	2.41%
Activation of NMDA receptors and postsynaptic events	0.52	- -	2.41%
Interferon Signaling	0.52	- -	2.86%
PEDF Signaling	0.53	- -	2.38%
FGF Signaling	0.53	- -	2.38%
Iron homeostasis signaling pathway	0.53	- -	2.26%
Striated Muscle Contraction	0.53	- -	2.78%
Inhibition of Matrix Metalloproteases	0.53	- -	2.78%
TP53 Regulates Metabolic Genes	0.54	- -	2.35%
Regulation of the Epithelial Mesenchymal Transition in Development Pathway	0.54	- -	2.35%
Mitochondrial Dysfunction	0.54	-0.45	2.12%
ICOS-ICOSL Signaling in T Helper Cells	0.54	- -	2.22%
Platelet homeostasis	0.54	- -	2.33%
Aspirin ADME	0.54	- -	2.70%
Type I Diabetes Mellitus Signaling	0.55	- -	2.21%
SAPK/JNK Signaling	0.55	- -	2.21%
Ephrin A Signaling	0.55	- -	2.21%
T Cell Exhaustion Signaling Pathway	0.55	- -	2.16%
Calcium-induced T Lymphocyte Apoptosis	0.55	- -	2.30%
GABAergic Receptor Signaling Pathway (Enhanced)	0.55	- -	2.19%
Regulation of mitotic cell cycle	0.55	- -	2.27%
tRNA Charging	0.55	- -	2.63%
Resolution of Abasic Sites (AP sites)	0.55	- -	2.63%
Pyroptosis Signaling Pathway	0.56	- -	2.25%
Systemic Lupus Erythematosus in T Cell Signaling Pathway	0.56	1.34	2.10%
Bone Mineralization Signaling Pathway	0.56	- -	2.16%
GNRH Signaling	0.56	- -	2.12%
Unfolded protein response	0.57	- -	2.22%
Degradation of beta-catenin by the destruction complex	0.57	- -	2.22%
DAG and IP3 signaling	0.57	- -	2.50%
ERBB Signaling	0.58	- -	2.15%
MITF-M-dependent gene expression	0.59	- -	2.11%
Assembly and cell surface presentation of NMDA receptors	0.6	- -	2.33%
TAK1-dependent IKK and NF-kappa-B activation	0.61	- -	2.27%
SUMOylation of transcription cofactors	0.61	- -	2.27%
Dermatan Sulfate Biosynthesis (Late Stages)	0.61	- -	2.27%
BER (Base Excision Repair) Pathway	0.61	- -	2.27%
tRNA Splicing	0.61	- -	2.22%
Role of OCT4 in Mammalian Embryonic Stem Cell Pluripotency	0.61	- -	2.22%
Role of IL-17F in Allergic Inflammatory Airway Diseases	0.61	- -	2.22%
Interleukin-2 family signaling	0.61	- -	2.22%
Nicotine Degradation III	0.62	- -	2.17%
Nucleosome assembly	0.63	- -	2.13%
Chondroitin Sulfate Biosynthesis (Late Stages)	0.63	- -	2.13%
BBSome Signaling Pathway	1	- -	0.64%
G-Protein Coupled Receptor Signaling	1	0.45	0.88%
Breast Cancer Regulation by Stathmin1	1	-1	0.87%
Eicosanoid Signaling	1	- -	0.37%
Chromatin organization	1	- -	0.39%
Lung Ionic Balance Signaling Pathway	1	-1.34	1.02%
Molecular Mechanisms of Cancer	1	0	1.33%
IL-4 Signaling	1	- -	0.50%
NF1 RAS Signaling Pathway	1	-0.82	1.17%
Gustation Pathway	1	- -	0.52%
Adrenergic Receptor Signaling Pathway (Enhanced)	1	- -	0.53%
Irritable Bowel Syndrome Signaling Pathway	1	- -	0.78%
Endothelin-1 Signaling	1	- -	0.54%
Cohesin Chromatin Regulation Pathway	1	- -	0.82%
Cellular Effects of Sildenafil (Viagra)	1	0.71	1.38%
Dopamine-DARPP32 Feedback in cAMP Signaling	1	- -	0.58%
CREB Signaling in Neurons	1	-2.65	1.35%
Erythropoietin Signaling Pathway	1	- -	0.59%
Orexin Signaling Pathway	1	- -	0.87%
Zn Homeostasis Signaling Pathway	1	-0.33	1.46%
Role of NFAT in Cardiac Hypertrophy	1	- -	0.90%
HEY1 Signaling Pathway	1	- -	0.65%
NAFLD Signaling Pathway	1	- -	0.93%
Relaxin Signaling	1	- -	0.66%
Factors Promoting Cardiogenesis in Vertebrates	1	- -	0.67%
Cell Cycle Checkpoints	1	- -	1.11%
Corticotropin Releasing Hormone Signaling	1	- -	0.68%
RNA Polymerase II Transcription	1	- -	0.68%
Endocannabinoid Cancer Inhibition Pathway	1	- -	0.69%
Mitotic Prometaphase	1	- -	0.98%
Colorectal Cancer Metastasis Signaling	1	- -	1.15%
Gαi Signaling	1	- -	0.71%
Deubiquitination	1	- -	1.15%
Circadian Rhythm Signaling	1	- -	1.17%
Cilia Biogenesis Signaling Pathway	1	- -	1.01%
Cardiac Hypertrophy Signaling	1	- -	1.18%
Role of Chondrocytes in Rheumatoid Arthritis Signaling Pathway	1	- -	0.74%
Hereditary Breast Cancer Signaling	1	- -	0.74%
CCR5 Signaling in Macrophages	1	- -	0.75%
CDX Gastrointestinal Cancer Signaling Pathway	1	- -	1.05%
Synaptic Long Term Depression	1	- -	1.06%
Neddylation	1	- -	1.23%
Autism Signaling Pathway	1	1	1.34%
AMPK Signaling	1	- -	1.24%
Endocannabinoid Developing Neuron Pathway	1	- -	0.79%
CGAS-STING Signaling Pathway	1	- -	0.79%
Superpathway of Inositol Phosphate Compounds	1	- -	1.25%
Docosahexaenoic Acid (DHA) Signaling	1	- -	1.25%
Glycerophospholipid biosynthesis	1	- -	0.80%
Ion channel transport	1	- -	1.10%
Costimulation by the CD28 family	1	- -	0.81%
Senescence Pathway	1	- -	1.38%
NGF Signaling	1	- -	0.83%
Renin-Angiotensin Signaling	1	- -	0.83%
cAMP-mediated signaling	1	- -	1.29%
Regulation of lipid metabolism by PPARalpha	1	- -	0.85%
p38 MAPK Signaling	1	- -	0.86%
GPCR-Mediated Nutrient Sensing in Enteroendocrine Cells	1	- -	0.86%
Fc Epsilon RI Signaling	1	- -	0.87%
WNT/β-catenin Signaling	1	- -	1.18%
Role of Osteoblasts, Osteoclasts and Chondrocytes in Rheumatoid Arthritis	1	- -	1.35%
Bladder Cancer Signaling	1	- -	0.89%
Cardiac β-adrenergic Signaling	1	- -	1.20%
Chronic Myeloid Leukemia Signaling	1	1	1.47%
CXCR4 Signaling	1	- -	1.21%
Neurovascular Coupling Signaling Pathway	1	- -	1.39%
Antioxidant Action of Vitamin C	1	- -	0.93%
Autophagy	1	- -	1.40%
3-phosphoinositide Biosynthesis	1	- -	1.40%
Oxidative Phosphorylation	1	- -	0.95%
Ovarian Cancer Signaling	1	- -	1.27%
WNK Renal Signaling Pathway	1	- -	0.97%
p75 NTR receptor-mediated signalling	1	- -	1.28%
Regulation of endogenous retroelements	1	- -	0.98%
Mitotic Prophase	1	- -	0.99%
Gene Silencing by RNA	1	- -	1%
D-myo-inositol-5-phosphate Metabolism	1	- -	1.48%
Cilium Assembly	1	- -	1.48%
ATM Signaling	1	- -	1.01%
KEAP1-NFE2L2 pathway	1	- -	1.32%
Transcriptional regulation by RUNX1	1	- -	1.33%
G alpha (i) signalling events	1	0	1.59%
PTEN Regulation	1	- -	1.34%
TGF-β Signaling	1	- -	1.03%
3-phosphoinositide Degradation	1	- -	1.51%
Endocannabinoid Neuronal Synapse Pathway	1	- -	1.36%
Aryl Hydrocarbon Receptor Signaling	1	- -	1.36%
Non-Small Cell Lung Cancer Signaling	1	- -	1.05%
Class B/2 (Secretin family receptors)	1	- -	1.05%
Hedgehog 'on' state	1	- -	1.39%
TCF dependent signaling in response to WNT	1	- -	1.55%
Oxytocin in Brain Signaling Pathway	1	- -	1.55%
Sperm Motility	1	- -	1.64%
C-type lectin receptors (CLRs)	1	- -	1.40%
Apelin Endothelial Signaling Pathway	1	- -	1.41%
Acetylcholine Receptor Signaling Pathway	1	- -	1.57%
Protein Kinase A Signaling	1	0.45	1.82%
Opioid Signalling	1	- -	1.12%
Ceramide Signaling	1	- -	1.12%
D-myo-inositol (3,4,5,6)-tetrakisphosphate Biosynthesis	1	- -	1.60%
D-myo-inositol (1,4,5,6)-Tetrakisphosphate Biosynthesis	1	- -	1.60%
Ribonucleotide Reductase Signaling Pathway	1	- -	1.89%
IL-17 Signaling	1	- -	1.89%
Parkinson's Signaling Pathway	1	-2.45	2.03%
Prostate Cancer Signaling	1	- -	1.77%
Hedgehog 'off' state	1	- -	1.77%
Intra-Golgi and retrograde Golgi-to-ER traffic	1	1	1.97%
Cardiac Hypertrophy Signaling (Enhanced)	1	-1.63	2.10%
Heparan Sulfate Biosynthesis	1	- -	1.47%
NF-κB Signaling	1	-1	1.99%
NUR77 Signaling in T Lymphocytes	1	- -	1.82%
HOTAIR Regulatory Pathway	1	- -	1.95%
Glutamate Receptor Signaling	1	- -	1.52%
ERBB4 Signaling	1	- -	1.52%
CD40 Signaling	1	- -	1.52%
Sphingolipid metabolism	1	- -	1.83%
Nucleotide Excision Repair	1	- -	1.85%
Airway Pathology in Chronic Obstructive Pulmonary Disease	1	- -	1.85%
Human Embryonic Stem Cell Pluripotency	1	0	2.04%
Preeclampsia Signaling Pathway	1	- -	1.99%
Transport of inorganic cations/anions and amino acids/oligopeptides	1	- -	1.87%
Role of WNT/GSK-3β Signaling in the Pathogenesis of Influenza	1	- -	1.59%
Induction of Apoptosis by HIV1	1	- -	1.59%
eNOS Signaling	1	- -	2.01%
IGF-1 Signaling	1	- -	1.92%
Regulation of the Epithelial-Mesenchymal Transition Pathway	1	- -	2.09%
WNT/SHH Axonal Guidance Signaling Pathway	1	- -	2.04%
IL-10 Signaling	1	- -	2.04%
Heparan Sulfate Biosynthesis (Late Stages)	1	- -	1.64%
ABC-family proteins mediated transport	1	- -	1.94%
Apoptosis Signaling	1	- -	1.96%
rRNA modification in the nucleus and cytosol	1	- -	1.67%
PCP (Planar Cell Polarity) Pathway	1	- -	1.67%
Necroptosis Signaling Pathway	1	- -	2.08%
Phase II - Conjugation of compounds	1	- -	1.98%
Polyamine Regulation in Colon Cancer	1	- -	1.69%
S Phase	1	- -	2%
Th17 Activation Pathway	1	- -	2.02%
Protein folding	1	- -	2.02%
Neuropathic Pain Signaling in Dorsal Horn Neurons	1	- -	2.02%
TNF signaling	1	- -	1.75%
Role of JAK2 in Hormone-like Cytokine Signaling	1	- -	1.75%
Dermatan Sulfate Biosynthesis	1	- -	1.75%
UVA-Induced MAPK Signaling	1	- -	2.06%
RUNX1 regulates megakaryocyte differentiation and platelet function	1	- -	1.79%
EGF Signaling	1	- -	1.79%
Deadenylation-dependent mRNA decay	1	- -	1.79%
Superpathway of Melatonin Degradation	1	- -	1.82%
Serotonin Degradation	1	- -	1.82%
Interleukin-3, Interleukin-5 and GM-CSF signaling	1	- -	1.82%
Chondroitin Sulfate Biosynthesis	1	- -	1.82%
CD27 Signaling in Lymphocytes	1	- -	1.82%
Lymphotoxin β Receptor Signaling	1	- -	1.85%
Activation of IRF by Cytosolic Pattern Recognition Receptors	1	- -	1.85%
Signaling by PTK6	1	- -	1.89%
Meiotic synapsis	1	- -	1.89%
Role of PI3K/AKT Signaling in the Pathogenesis of Influenza	1	- -	1.92%
UVC-Induced MAPK Signaling	1	- -	1.96%
UVB-Induced MAPK Signaling	1	- -	1.96%
Nicotine Degradation II	1	- -	1.96%
FAT10 Cancer Signaling Pathway	1	- -	1.96%
Cell Cycle: G2/M DNA Damage Checkpoint Regulation	1	- -	1.96%
Transcriptional activity of SMAD2/SMAD3:SMAD4 heterotrimer	1	- -	2%
TNFR1 Signaling	1	- -	2%
Melatonin Degradation I	1	- -	2%
B-WICH complex positively regulates rRNA expression	1	- -	2%
TP53 Regulates Transcription of Cell Cycle Genes	1	- -	2.04%
Pyruvate metabolism	1	- -	2.04%
MYC Mediated Apoptosis Signaling	1	- -	2.04%
Amyloid Processing	1	- -	2.04%
nNOS Signaling in Skeletal Muscle Cells	1	- -	2.08%
XBP1(S) activates chaperone genes	1	- -	2.08%
DNA Damage Bypass	1	- -	2.08%
Role of Pattern Recognition Receptors in Recognition of Bacteria and Viruses	1	- -	1.45%
Mitotic Metaphase and Anaphase	1	2	1.70%
Adipogenesis pathway	1	- -	1.47%
Tuberculosis Latent Signaling Pathway	1	- -	1.18%
Transcriptional regulation of white adipocyte differentiation	1	- -	1.19%
PI Metabolism	1	- -	1.19%
Pathogen Induced Cytokine Storm Signaling Pathway	1	0	1.85%
Apelin Adipocyte Signaling Pathway	1	- -	1.20%
Mitotic G1 phase and G1/S transition	1	- -	1.53%
Oxytocin Signaling Pathway	1	-0.45	1.82%
NFKBIE Signaling Pathway	1	- -	1.22%
Cardiac conduction	1	- -	1.54%
Protein Sorting Signaling Pathway	1	- -	1.69%
Interleukin-1 family signaling	1	- -	1.56%
Xenobiotic Metabolism Signaling	1	- -	1.85%
Role of BRCA1 in DNA Damage Response	1	- -	1.25%
Insulin Secretion Signaling Pathway	1	- -	1.85%
TR/RXR Activation	1	- -	1.57%
HER-2 Signaling in Breast Cancer	1	1	1.80%
ER-Mitochondrial Communication Signaling Pathway	1	- -	1.27%
Chemokine Signaling	1	- -	1.27%
Glutaminergic Receptor Signaling Pathway (Enhanced)	1	-1.63	1.90%
Role of MAPK Signaling in the Pathogenesis of Influenza	1	- -	1.28%
Renal Cell Carcinoma Signaling	1	- -	1.28%
Glioma Signaling	1	- -	1.61%
RAR Activation	1	0.71	1.97%
SUMOylation of DNA damage response and repair proteins	1	- -	1.30%
Neurotrophin/TRK Signaling	1	- -	1.30%
Estrogen-Dependent Breast Cancer Signaling	1	- -	1.30%
Hepatitis B Chronic Liver Pathogenesis Signaling Pathway	1	- -	1.76%
Glioblastoma Multiforme Signaling	1	- -	1.76%
GDNF Family Ligand-Receptor Interactions	1	- -	1.32%
Angiopoietin Signaling	1	- -	1.32%
Aldosterone Signaling in Epithelial Cells	1	- -	1.78%
Synthesis of DNA	1	- -	1.64%
Androgen Signaling	1	- -	1.79%
T Cell Receptor Signaling	1	- -	1.88%
Hepatic Cholestasis	1	2	1.89%
Synaptic Long Term Potentiation	1	- -	1.68%
Role of MAPK Signaling in Inhibiting the Pathogenesis of Influenza	1	- -	1.37%
Estrogen Receptor Signaling	1	-1	2.02%
Signaling by FGFR2	1	- -	1.39%
Transcriptional Regulatory Network in Embryonic Stem Cells	1	- -	1.85%
IL-7 Signaling Pathway	1	- -	1.41%
ESR-mediated signaling	1	- -	1.72%
TREM1 Signaling	1	- -	1.43%
Melatonin Signaling	1	- -	1.43%
Growth Hormone Signaling	1	- -	1.43%
GM-CSF Signaling	1	- -	1.43%
Amyotrophic Lateral Sclerosis Signaling	1	- -	1.75%
